# Supplementary material
Source: Springer Nature journal article supplement (https://www.springermedizin.de/resource/supplementary/13063_2010_534_MOESM4_ESM.pdf/9618180)
Supplement: MOESM4 [file 9618180]

# Engagement

## Therapeutic relationship

relaxed atmosphere

humor

empathy

limited self-disclosure of the therapist

affirmation

respect regarding patients' autonomy

### Assessment and shared formulation

### Treatment plan

### Work on

#### Delusional beliefs

- focus on maintenance of beliefs and safety behaviour
- focus on information processing and cognitive bias (Threat perception, Jumping to conclusions, Externalising, intention of others)

#### Hallucinations

- reducing stress (in order to reduce activating events)
- reevaluation of the source of voices
- reality testing regarding meta cognitions (e.g. omnipotence of voices )
- improving coping strategies for persistent hallucinations

#### Dysfunctional cognitive schemata

- Schemas are stable patterns of information processing, eg. schema of
- defectiveness
  - mistrust
  - isolation

#### Social integration

- Focus on factors which reduce social integration like generalised negative expectations and deficits of social competences
